# Supplementary material for: Co-Occurrence of β-Lactam and Aminoglycoside Resistance Determinants among Clinical and Environmental Isolates of Klebsiella pneumoniae and Escherichia coli: A Genomic Approach
Source: MDPI journal article supplement (doi:10.3390/ph15081011), 2022-08-17
Supplement: s1 [file s1]

# Supplementary

Table S1. Genomic features of *E. coli* and *K. pneumoniae* isolates

| ID   | PubMLST              | Biosample    | Contigs    | Genome Length | GC Content | CDS         | tRNA      | rRNA     | N50    | Median coverage depth |
|------|----------------------|--------------|------------|---------------|------------|-------------|-----------|----------|--------|-----------------------|
| 1EE  | <i>E. coli</i>       | SAMN22568277 | <u>897</u> | 5475233       | 50.47      | <u>6032</u> | 67        | 2        | 19330  | 218                   |
| 4EE  | <i>E. coli</i>       | SAMN22568278 | <u>550</u> | 5140546       | 50.39      | <u>5302</u> | 34        | 5        | 28232  | 223                   |
| 6EE  | <i>E. coli</i>       | SAMN22568279 | <u>102</u> | 4933387       | 50.95      | <u>4873</u> | 38        | 8        | 185511 | 223                   |
| 7EE  | <i>E. coli</i>       | SAMN22568280 | <u>118</u> | 4813344       | 50.73      | <u>4762</u> | 75        | 3        | 151269 | 272                   |
| 11EE | <i>E. coli</i>       | SAMN22568280 | 322        | 4738655       | 50.7       | <u>4800</u> | 40        | 5        | 40928  | 202                   |
| 13EE | <i>E. coli</i>       | SAMN22568282 | 256        | 4582345       | 50.9       | <u>2326</u> | <u>21</u> | 2        | 56438  | 185                   |
| 14EE | <i>E. coli</i>       | SAMN22568283 | 323        | 4888694       | 50.67      | <u>4143</u> | <u>34</u> | 4        | 195936 | 239                   |
| 16EE | <i>E. coli</i>       | SAMN22568284 | 100        | 4856794       | 50.69      | <u>4783</u> | <u>77</u> | 4        | 162048 | 308                   |
| 1EP  | <i>E. coli</i>       | SAMN22568285 | 891        | 4954601       | 50.84      | <u>5413</u> | 39        | 4        | 28399  | 147                   |
| 5EP  | <i>E. coli</i>       | SAMN22568286 | 186        | 5350986       | 50.45      | <u>5358</u> | <u>87</u> | <u>5</u> | 150097 | 185                   |
| 8EP  | <i>E. coli</i>       | SAMN22568287 | 645        | 5273033       | 50.56      | <u>5475</u> | 46        | 5        | 105067 | 138                   |
| 10EP | <i>E. coli</i>       | SAMN22568288 | 193        | 4767339       | 50.83      | <u>4798</u> | 76        | 2        | 78177  | 238                   |
| 11EP | <i>E. coli</i>       | SAMN22568289 | 633        | 5425295       | 50.37      | <u>5728</u> | <u>46</u> | <u>3</u> | 70463  | 133                   |
| 12EP | <i>E. coli</i>       | SAMN22568290 | <u>308</u> | 4662795       | 50.79      | <u>4651</u> | 41        | 5        | 238555 | 293                   |
| 15EP | <i>E. coli</i>       | SAMN22568291 | 87         | 4989418       | 50.48      | <u>4895</u> | <u>79</u> | 4        | 331963 | 292                   |
| 20EP | <i>E. coli</i>       | SAMN22568292 | 603        | 5161678       | 50.68      | <u>5357</u> | 43        | 5        | 44314  | 156                   |
| 24EP | <i>E. coli</i>       | SAMN22568293 | 711        | 5211395       | 50.6       | <u>5490</u> | 44        | 4        | 53114  | 88                    |
| 25EP | <i>E. coli</i>       | SAMN22568294 | 631        | 5159300       | 50.68      | <u>5373</u> | 43        | 4        | 41360  | 148                   |
| 26EP | <i>E. coli</i>       | SAMN22860965 | 139        | 5182400       | 50.55      | <u>5222</u> | 86        | 4        | 163013 | 326                   |
| 27EP | <i>E. coli</i>       | SAMN22568295 | 486        | 4951868       | 50.69      | <u>5083</u> | 44        | 7        | 41947  | 135                   |
| 28EP | <i>E. coli</i>       | SAMN22568296 | 367        | 4930045       | 50.58      | <u>4994</u> | 45        | 4        | 46893  | 126                   |
| 30EP | <i>E. coli</i>       | SAMN22568297 | 149        | 5227267       | 50.6       | <u>2960</u> | 41        | 2        | 105971 | 241                   |
| 1KE  | <i>K. pneumoniae</i> | SAMN22857709 | 64         | 5415845       | 57.08      | <u>5337</u> | 75        | 3        | 264164 | 269                   |
| 2KE  | <i>K. pneumoniae</i> | SAMN22857710 | 307        | 5287854       | 57.24      | <u>5340</u> | 37        | 6        | 38144  | 197                   |
| 7KE  | <i>K. pneumoniae</i> | SAMN22857714 | 379        | 5357423       | 57.27      | <u>5468</u> | 40        | 5        | 58874  | 169                   |
| 8KE  | <i>K. pneumoniae</i> | SAMN22857716 | 263        | 5258392       | 57.88      | <u>5231</u> | 38        | 4        | 50455  | 190                   |
| 11KE | <i>K. pneumoniae</i> | SAMN22857717 | 66         | 5404444       | 57.27      | <u>4460</u> | 63        | 2        | 236656 | 247                   |
| 12KE | <i>K. pneumoniae</i> | SAMN22857718 | 540        | 5762894       | 56.77      | <u>5941</u> | 39        | 7        | 38802  | 166                   |

|      |                      |              |     |          |       |             |           |    |        |     |
|------|----------------------|--------------|-----|----------|-------|-------------|-----------|----|--------|-----|
| 15KE | <i>K. pneumoniae</i> | SAMN22857726 | 91  | 5488393  | 56.99 | <u>5405</u> | 75        | 3  | 350278 | 311 |
| 16KE | <i>K. pneumoniae</i> | SAMN22857722 | 44  | 5671546b | 56.96 | <u>5569</u> | 76        | 5  | 451883 | 292 |
| 17KE | <i>K. pneumoniae</i> | SAMN22857723 | 156 | 5415843  | 57.22 | <u>5342</u> | 76        | 4  | 125571 | 369 |
| 19KE | <i>K. pneumoniae</i> | SAMN22857724 | 65  | 5458400  | 57.16 | <u>5353</u> | 75        | 5  | 357556 | 321 |
| 20KE | <i>K. pneumoniae</i> | SAMN22857725 | 108 | 5310880  | 57.4  | <u>5214</u> | <u>76</u> | 4  | 189136 | 540 |
| 21KE | <i>K. pneumoniae</i> | SAMN22857727 | 21  | 5294801  | 57.43 | <u>5148</u> | 76        | 5  | 272625 | 290 |
| 23KE | <i>K. pneumoniae</i> | SAMN22857728 | 31  | 5211037  | 57.48 | <u>5052</u> | 74        | 4  | 373869 | 285 |
| 3KP  | <i>K. pneumoniae</i> | SAMN22857711 | 360 | 5454149  | 57.23 | <u>5491</u> | 34        | 6  | 51712  | 191 |
| 5KP  | <i>K. pneumoniae</i> | SAMN22857712 | 387 | 5535606  | 57.02 | <u>5634</u> | 40        | 5  | 51948  | 148 |
| 6KP  | <i>K. pneumoniae</i> | SAMN22857713 | 386 | 5535420  | 57.02 | <u>5628</u> | 41        | 5  | 54815  | 168 |
| 7KP  | <i>K. pneumoniae</i> | SAMN22857715 | 391 | 5534264  | 57.03 | <u>5631</u> | 42        | 6  | 56535  | 135 |
| 12KP | <i>K. pneumoniae</i> | SAMN22857719 | 465 | 5603818  | 56.77 | <u>5720</u> | 50        | 10 | 58941  | 128 |
| 13KP | <i>K. pneumoniae</i> | SAMN22857720 | 379 | 5535338  | 57.03 | <u>5618</u> | 39        | 4  | 56449  | 108 |
| 14KP | <i>K. pneumoniae</i> | SAMN22857721 | 494 | 5535678  | 57.03 | <u>5704</u> | 40        | 4  | 30293  | 169 |

Table S2: Point mutations associated with antibiotic resistance

| Isolate ID | Species        | beta-lactam antibiotics | Fosfomycin |       |       | Pulvomycin | MDR  | fluoroquinolone |      |              |
|------------|----------------|-------------------------|------------|-------|-------|------------|------|-----------------|------|--------------|
|            |                | PBP3                    | cyaA       | UhpT  | GlpT  | EF-Tu      | acrR | parC            | gyrA | marR         |
| 1EE        | <i>E. coli</i> | D350N, S357N            | -          | -     | E448K | R234F      | -    | -               | -    | Y137H, G103S |
| 4EE        | <i>E. coli</i> | D350N, S357N            | -          | -     | E448K | R234F      | -    | -               | -    | Y137H, G103S |
| 6EE        | <i>E. coli</i> | -                       | -          | E350Q | E448K | -          | -    | -               | -    | Y137H, G103S |
| 7EE        | <i>E. coli</i> | -                       | -          | -     | E448K | R234F      | -    | -               | -    | Y137H, G103S |
| 11EE       | <i>E. coli</i> | -                       | -          | -     | E448K | R234F      | -    | -               | -    | Y137H, G103S |
| 13EE       | <i>E. coli</i> | -                       | -          | -     | E448K | R234F      | -    | -               | -    | Y137H, G103S |
| 14EE       | <i>E. coli</i> | -                       | -          | -     | -     | -          | -    | -               | -    | -            |
| 16EE       | <i>E. coli</i> | D350N, S357N            | -          | -     | E448K | -          | -    | -               | -    | Y137H, G103S |

|      |                      |              |       |       |       |       |              |      |            |              |
|------|----------------------|--------------|-------|-------|-------|-------|--------------|------|------------|--------------|
| 1EP  | <i>E. coli</i>       | D350N, S357N | -     | -     | E448K | R234F | -            | -    | -          | Y137H, G103S |
| 5EP  | <i>E. coli</i>       | -            | S352T | -     | E448K | R234F | -            | -    | -          | Y137H, G103S |
| 8EP  | <i>E. coli</i>       | -            | S352T | -     | E448K | R234F | -            | S80I | D87N, S83L | Y137H, G103S |
| 10EP | <i>E. coli</i>       | -            | S352T | -     | E448K | R234F | -            | S80I | D87N, S83L | -            |
| 11EP | <i>E. coli</i>       | -            | S352T | -     | E448K | R234F | -            | S80I | D87N, S83L | Y137H, G103S |
| 12EP | <i>E. coli</i>       | -            | -     | -     | E448K | R234F | -            | -    | -          | Y137H, G103S |
| 15EP | <i>E. coli</i>       | -            | -     | -     | E448K | R234F | -            | -    | -          | Y137H, G103S |
| 20EP | <i>E. coli</i>       | -            | S352T | -     | E448K | R234F | -            | S80I | D87N, S83L | -            |
| 24EP | <i>E. coli</i>       | -            | S352T | -     | E448K | R234F | -            | S80I | D87N, S83L | Y137H, G103S |
| 25EP | <i>E. coli</i>       | -            | S352T | -     | E448K | R234F | -            | S80I | -          | -            |
| 26EP | <i>E. coli</i>       | -            | -     | E350Q | E448K | R234F | -            | -    | -          | Y137H, G103S |
| 27EP | <i>E. coli</i>       | -            | -     | -     | -     | R234F | -            |      | S83L       | -            |
| 28EP | <i>E. coli</i>       | -            | -     | -     | E448K | R234F | -            | S80I | D87N, S83L | Y137H, G103S |
| 30EP | <i>E. coli</i>       | -            | S352T |       | E448K | R234F | -            | S80I | D87N, S83L | -            |
| 1KE  | <i>K. pneumoniae</i> | -            | -     | E350Q | -     | -     | -            |      | -          | -            |
| 2KE  | <i>K. pneumoniae</i> | -            | -     | E350Q | -     | R234F | -            |      | -          | -            |
| 7KE  | <i>K. pneumoniae</i> | -            | -     | E350Q | -     | R234F | -            |      | -          | -            |
| 8KE  | <i>K. pneumoniae</i> | -            | -     | E350Q | -     | -     | Y114F, V165I | -    | -          | -            |
| 11KE | <i>K. pneumoniae</i> | -            | -     | E350Q | -     | R234F | -            |      | -          | -            |
| 12KE | <i>K. pneumoniae</i> | -            | -     | E350Q | -     | R234F | -            |      | -          | -            |
| 15KE | <i>K. pneumoniae</i> | -            | -     | E350Q | -     | R234F | -            |      | -          | -            |
| 16KE | <i>K. pneumoniae</i> | -            | -     | E350Q | -     | -     | -            | -    | -          | -            |
| 17KE | <i>K. pneumoniae</i> | -            | -     | E350Q | -     | -     | -            | -    | -          | -            |
| 19KE | <i>K. pneumoniae</i> | -            | -     | nil   | -     | -     | -            | -    | -          | -            |

|      |                      |   |   |       |   |   |   |   |   |   |
|------|----------------------|---|---|-------|---|---|---|---|---|---|
| 20KE | <i>K. pneumoniae</i> | - | - | nil   | - | - | - | - | - | - |
| 21KE | <i>K. pneumoniae</i> | - | - | nil   | - | - | - | - | - | - |
| 23KE | <i>K. pneumoniae</i> | - | - | E350Q | - | - | - | - | - | - |
| 3KP  | <i>K. pneumoniae</i> | - | - | E350Q | - | - | - | - | - | - |
| 5KP  | <i>K. pneumoniae</i> | - | - | E350Q | - | - | - | - | - | - |
| 6KP  | <i>K. pneumoniae</i> | - | - | E350Q | - | - | - | - | - | - |
| 7KP  | <i>K. pneumoniae</i> | - | - | E350Q | - | - | - | - | - | - |
| 12KP | <i>K. pneumoniae</i> | - | - | E350Q | - | - | - | - | - | - |
| 13KP | <i>K. pneumoniae</i> | - | - | E350Q | - | - | - | - | - | - |
| 14KP | <i>K. pneumoniae</i> | - | - | E350Q | - | - | - | - | - | - |

**Table S3. Genes associated with antibiotic efflux, antibiotic target alteration and protection**

| ID   | Species        | Source    | Gene                                                                                                                                                             |
|------|----------------|-----------|------------------------------------------------------------------------------------------------------------------------------------------------------------------|
| 1EE  | <i>E. coli</i> | Community | acrB, msbA, emrR, emrB, mdtG, AcrE, cpxA, H-NS, marA, evgA, mdtE, TolC, sul2, emrA, CRP, bacA, mdtH, AcrF, AcrS                                                  |
| 4EE  | <i>E. coli</i> | Community | mdtG, mdtH, marA, msbA, acrB, <i>E. coli</i> acrA, AcrE, <i>E. coli</i> ampH beta-lactamase, evgA, cpxA, emrB, emrR, TolC, mdtE, H-NS, baeR, <i>E. coli</i> emrE |
| 6EE  | <i>E. coli</i> | Community | AcrE, TolC, H-NS, mdtG, baeS, acrB, <i>E. coli</i> acrA, mdtE, msbA, emrR, emrB, evgA, cpxA, marA                                                                |
| 7EE  | <i>E. coli</i> | Community | evgA, baeR, baeS, mdtG, mdtH, H-NS, marA, acrB, <i>E. coli</i> acrA, emrR, TolC, cpxA, msbA, mdtE, AcrE                                                          |
| 11EE | <i>E. coli</i> | Community | <i>E. coli</i> acrA, H-NS, bacA, msbA, mdtG, mdtH, AcrS, AcrE, mdtC, YojI, PmrF, emrB, mdtN, TolC, gadX, mdtF, mdtE, evgA, emrK, marA                            |
| 13EE | <i>E. coli</i> | Community | acrB, <i>E. coli</i> acrA, mdtH, mdtG, emrY, evgA, msbA, PmrF, TolC, cpxA, emrB, AcrE, AcrS, mdtE, H-NS, baeS, marA                                              |
| 14EE | <i>E. coli</i> | Community | baeS, PmrF, evgA, TolC, AcrE, mdtG, H-NS, emrR, emrB, mdtE, <i>E. coli</i> acrA, acrB, <i>E. coli</i> ampH beta-lactamase, msbA, cpxA, marA                      |

|      |                      |           |                                                                                                                                                                                                                                                                                                                              |
|------|----------------------|-----------|------------------------------------------------------------------------------------------------------------------------------------------------------------------------------------------------------------------------------------------------------------------------------------------------------------------------------|
| 16EE | <i>E. coli</i>       | Community | baeS, PmrF, H-NS, msbA, emrY, evgA, AcrE, <i>E. coli</i> acrA, acrB, TolC, cpxA, marA, emrB, emrR                                                                                                                                                                                                                            |
| 1EP  | <i>E. coli</i>       | Clinical  | marA, acrA, acrB, evgA, QnrB4, DHA-1, sul1, mphA, H-NS, cpxA, msbA, mdtG, mdtH, AcrE, ampH, emrR, PmrF, mdtE, bacA, mdtP, mdtO, mdtN, baeRbaeS                                                                                                                                                                               |
| 5EP  | <i>E. coli</i>       | Clinical  | TolC, baeR, marA, msbA, emrB, emrR, evgA, emrK, mdtH, mdtG, mdtF, H-NS, cpxA                                                                                                                                                                                                                                                 |
| 8EP  | <i>E. coli</i>       | Clinical  | mdtH, TolC, marA, evgA, emrK, emrY, baeR, msbA, emrR, emrB, H-NS, sul2, dfrA17, qacEdelta1, sul1                                                                                                                                                                                                                             |
| 10EP | <i>E. coli</i>       | Clinical  | mdtG, mdtH, H-NS, msbA, acrD, <i>E. coli</i> acrA, acrB, evgS, evgA, emrK, PmrF, YojI, bacA, TolC, mdtP, mdtN, marA, emrR, emrB, mdtE, gadX, dfrA17, qacEdelta1                                                                                                                                                              |
| 11EP | <i>E. coli</i>       | Clinical  | mdtG, marA, cpxA, TolC, emrY, evgA, msbA, acrB, <i>E. coli</i> ampH beta-lactamase, kdpE, baeR, mphA, sul1, qacEdelta1, aadA5, dfrA17, H-NS                                                                                                                                                                                  |
| 12EP | <i>E. coli</i>       | Clinical  | baeS, PmrF, emrY, evgA, mdtG, H-NS, emrR, emrB, marA, AcrE, TolC, msbA, mdtE, <i>E. coli</i> acrA, cpxA                                                                                                                                                                                                                      |
| 15EP | <i>E. coli</i>       | Clinical  | evgA, baeR, emrR, H-NS, gadW, cpxA, mdtH                                                                                                                                                                                                                                                                                     |
| 20EP | <i>E. coli</i>       | Clinical  | emrK, emrY, H-NS, mdtG, mdtH, baeR, emrR, TolC, sul2, evgA, rmtB, marA, msbA, catI, QepA4, sul1, qacEdelta1, dfrA12, emrB                                                                                                                                                                                                    |
| 24EP | <i>E. coli</i>       | Clinical  | baeR, H-NS, mdtH, mdtG, TolC, marA, emrY, emrK, evgA, sul2, emrR, msbA, emrB, QepA4, sul1, qacEdelta1, dfrA12, rmtB                                                                                                                                                                                                          |
| 25EP | <i>E. coli</i>       | Clinical  | marA, emrK, evgA, mdtG, mdtH, msbA, H-NS, emrR, dfrA12, qacEdelta1, sul1, BRP(MBL), emrB, TolC, baeR, sul2, rmtB, catI, QepA4                                                                                                                                                                                                |
| 26EP | <i>E. coli</i>       | Clinical  | emrB, emrR, mdtH, cpxA, H-NS, marA, evgA, emrK, emrY, sul2                                                                                                                                                                                                                                                                   |
| 27EP | <i>E. coli</i>       | Clinical  | <i>E. coli</i> acrA, acrB, <i>E. coli</i> ampH beta-lactamase, YojI, PmrF, evgA, kdpE, TolC, msbA, baeS, mdtG, mdtP, mdtN, AcrS, AcrE, emrA, emrB, H-NS, mdtF, gadX, marA, cpxA, bacA, mdtH                                                                                                                                  |
| 28EP | <i>E. coli</i>       | Clinical  | mdtG, evgA, AcrE, AcrS, emrR, msbA, TolC, marA, <i>E. coli</i> acrA, acrB, mdtB, cpxA, mdtE, H-NS,                                                                                                                                                                                                                           |
| 30EP | <i>E. coli</i>       | Clinical  | evgA, emrK, emrY, TolC, msbA, emrB, emrR, baeR, mdtG, mdtH, H-NS, marA                                                                                                                                                                                                                                                       |
| 1KE  | <i>K. pneumoniae</i> | Community | LptD, oqxA, <i>K. pneumoniae</i> KpnF, QnrS1, <i>K. pneumoniae</i> KpnH, <i>K. pneumoniae</i> KpnG, emrR, OmpA, CRP, ArnT, eptB, <i>K. pneumoniae</i> OmpK37                                                                                                                                                                 |
| 2KE  | <i>K. pneumoniae</i> | Community | <i>K. pneumoniae</i> KpnF, marA, adeF, LptD, H-NS, msbA, OmpA, ArnT, CRP, oqxA, adeF, emrR, <i>K. pneumoniae</i> KpnG, <i>K. pneumoniae</i> KpnH, <i>K. pneumoniae</i> KpnE, <i>K. pneumoniae</i> OmpK37, eptB, baeR                                                                                                         |
| 7KE  | <i>K. pneumoniae</i> | Community | <i>K. pneumoniae</i> KpnF, LptD, <i>K. pneumoniae</i> KpnE, <i>K. pneumoniae</i> OmpK37, <i>K. pneumoniae</i> KpnH, <i>K. pneumoniae</i> KpnG, emrR, adeF, oqxA, CRP, msbA, baeR, adeF, H-NS, ArnT, marA, tet(A), <i>K. pneumoniae</i> OmpK37, oqxA, adeF, emrR, <i>K. pneumoniae</i> KpnG, <i>K. pneumoniae</i> KpnH, H-NS, |
| 8KE  | <i>K. pneumoniae</i> | Community | LptD, eptB, CRP, marA, <i>K. pneumoniae</i> KpnF, <i>K. pneumoniae</i> KpnE, msbA, OmpA, adeF, ArnT, oqxA, LptD, <i>K. pneumoniae</i> KpnF, marA, emrR, <i>K. pneumoniae</i> KpnG, <i>K. pneumoniae</i> KpnH, adeF, eptB, ArnT, CRP, baeR, msbA, OmpA, <i>K. pneumoniae</i> OmpK37, H-NS, <i>K. pneumoniae</i> KpnE          |
| 11KE | <i>K. pneumoniae</i> | Community | LptD, oqxA, <i>K. pneumoniae</i> KpnF, <i>K. pneumoniae</i> OmpK37, marA, ArnT, OmpA, msbA, eptB, CRP, adeF, baeR, <i>K. pneumoniae</i> KpnH, <i>K. pneumoniae</i> KpnG, emrR, H-NS                                                                                                                                          |
| 12KE | <i>K. pneumoniae</i> | Community |                                                                                                                                                                                                                                                                                                                              |

|      |                      |           |                                                                                                                                                                                                  |
|------|----------------------|-----------|--------------------------------------------------------------------------------------------------------------------------------------------------------------------------------------------------|
| 15KE | <i>K. pneumoniae</i> | Community | LptD, K. pneumoniae KpnF, baeR, H-NS, K. pneumoniae Kpn, H, K. pneumoniae KpnG, emrR, oqxA, adeF, ompA, msbA, K. pneumoniae KpnE, K. pneumoniae ompK37, ArnT, CRP, eptB, marA                    |
| 16KE | <i>K. pneumoniae</i> | Community | K. pneumoniae ompK37, K. pneumoniae KpnE, K. pneumoniae KpnF, marA, H-NS, msbA, baeR, adeF, K. pneumoniae KpnH, K. pneumoniae KpnG, emrR, oqxA, LptD, eptB, ArnT, CRP                            |
| 17KE | <i>K. pneumoniae</i> | Community | K. pneumoniae KpnE, K. pneumoniae KpnF, H-NS, msbA, ompA, ArnT, eptB, K. pneumoniae KpnG, emrR, adeF, oqxA, baeR, K. pneumoniae ompK37, CRP, marA, LptD                                          |
| 19KE | <i>K. pneumoniae</i> | Community | LptD, K. pneumoniae KpnF, baeR, H-NS, marA, K. pneumoniae KpnG, ArnT, CRP, K. pneumoniae KpnE, eptB                                                                                              |
| 20KE | <i>K. pneumoniae</i> | Community | K. pneumoniae KpnF, LptD, K. pneumoniae KpnE, eptB, ArnT, CRP, ompA, oqxA, K. pneumoniae KpnG, K. pneumoniae KpnH                                                                                |
| 21KE | <i>K. pneumoniae</i> | Community | K. pneumoniae KpnF, LptD, oqxA, K. pneumoniae KpnG, K. pneumoniae KpnE, K. pneumoniae ompK37, H-NS, CRP, ArnT                                                                                    |
| 23KE | <i>K. pneumoniae</i> | Community | LptD, K. pneumoniae KpnF, K. pneumoniae KpnE, K. pneumoniae ompK37, K. pneumoniae KpnG, oqxA, CRP, ArnT                                                                                          |
| 3KP  | <i>K. pneumoniae</i> | Clinical  | oxqA, LptD, K. pneumoniae KpnF, K. pneumoniae KpnG, eptB, ompA, CRP, ArnT, K. pneumoniae KpnE, K. pneumoniae ompK37                                                                              |
| 5KP  | <i>K. pneumoniae</i> | Clinical  | QnrB1, LptD, dfrA14, K. pneumoniae KpnF, sul2, CRP, eptB, oqxA, adeF, emrR, K. pneumoniae KpnG, K. pneumoniae KpnH, ompA, msbA, ArnT, baeR                                                       |
| 6KP  | <i>K. pneumoniae</i> | Clinical  | LptD, K. pneumoniae KpnF, dfrA14, sul2, QnrB1, ArnT, H-NS, ompA, msbA, marA, baeR, K. pneumoniae KpnE, CRP, K. pneumoniae KpnH, K. pneumoniae KpnG, oqxA, K. pneumoniae ompK37                   |
| 7KP  | <i>K. pneumoniae</i> | Clinical  | K. pneumoniae KpnF, LptD, dfrA14, QnrB1, oqxA, adeF, emrR, K. pneumoniae KpnG, K. pneumoniae KpnH, baeR, ArnT, H-NS, K. pneumoniae KpnE, marA, CRP, eptB, ompA, K. pneumoniae ompK37             |
| 12KP | <i>K. pneumoniae</i> | Clinical  | LptD, K. pneumoniae KpnF, sul2, QnrB1, dfrA14, CRP, ArnT, eptB, oqxA, K. pneumoniae KpnG, ompA, K. pneumoniae KpnE, H-NS, K. pneumoniae ompK37                                                   |
| 13KP | <i>K. pneumoniae</i> | Clinical  | QnrB1, LptD, K. pneumoniae KpnF, dfrA14, sul2, msbA, oqxA, adeF, emrR, K. pneumoniae KpnG, K. pneumoniae KpnH, marA, baeR, K. pneumoniae ompK37, ompA, eptB, ArnT, K. pneumoniae KpnE, H-NS, CRP |
| 14KP | <i>K. pneumoniae</i> | Clinical  | LptD, QnrB1, sul2, dfrA14, K. pneumoniae KpnF, emrR, K. pneumoniae KpnG, K. pneumoniae KpnH, eptB, K. pneumoniae ompK37, marA, ompA, msbA, CRP, adeF, oqxA, baeR, K. pneumoniae KpnE             |

Table S4. Virulence and transposases genes detected in *K. pneumonia* and *E. coli* isolates

| ID   | Human pathogen probability | Virulence                                                                                                                           | Transposases                                                                                                               |
|------|----------------------------|-------------------------------------------------------------------------------------------------------------------------------------|----------------------------------------------------------------------------------------------------------------------------|
| 1EE  | 90                         | hra, gad, terC, astA, lpfA, terC                                                                                                    | MITEEc1, MITEEc1, Tn6024, MITEEc1, ISPpu12, ISEc11, MITEEc1, IS30, ISKpn8, IS4, IS421, IS629, ISKpn14.                     |
| 4EE  | 88                         | terC, fyuA, irp2, lpfA, cia, iss, iss, ompT, gad, gad, terC, capU                                                                   | ISSfl10, IS26, MITEEc1, MITEEc1, IS30, IS30, ISEc40, ISEc40, ISEc38, IS421, ISEc53, IS903, IS903                           |
| 6EE  | 93                         | terC, lpfA, gad                                                                                                                     | MITEEc1, MITEEc1, IS421, MITEEc1, IS30, ISEsa1, IS609, MITEEc1                                                             |
| 7EE  | 94                         | astA, terC, gad, iss, terC, lpfA                                                                                                    | MITEEc1, MITEEc1, IS102, MITEEc1, MITEEc1, IS102, MITEEc1, ISEc31                                                          |
| 11EE | 94                         | terC                                                                                                                                | MITEEc1, ISKpn8, IS421, ISEsa1,                                                                                            |
| 13EE | 94                         | ompT, gad, lpfA, terC, iss                                                                                                          | MITEEc1, ISEc17,                                                                                                           |
| 14EE | 94                         | terC, etsC, papC, iss, iroN, lpfA, gad, iss, mchF                                                                                   | MITEEc1, IS679, ISKpn24, ISKpn24, IS682, IS30, cn_51933_IS679, ISEc46                                                      |
| 16EE | 94                         | terC, cia, gad, gad, lpfA                                                                                                           | ISVsa3, ISKpn19, MITEEc1, IS102, ISEsa1, IS609, ISEam1, IS30, IS26                                                         |
| 1EP  | 93                         | sitA, terC, senB, cea, lpfA, astA, capU, traT, iss, fyuA, irp2, ompT, iutA, iucC, cia, iss, terC                                    | IS911, ISEc38, ISKpn24, ISEc30,                                                                                            |
| 5EP  | 91                         | sitA, irp2, fyuA, kpsMII_K5, kpsE, aggC, ORF4, aatA, aggR, terC, gad, iss, eilA, air, chuA, capU, hra, traT                         | MITEEc1, ISVsa3, IS6100, ISEc46, ISEc9, ISEc38, IS30, MITEEc1, IS609, IS609, ISEc31, ISEc38, IS100, IS5075, IS5075, SEc48. |
| 8EP  | 93                         | sitA, terC, eilA, kpsMII_K4, terC, hra, irp2, fyuA, sat, kpsE, iutA, iucC, senB, gad, traT, chuA, papA_F43                          | IS6100, ISEc9, Tn5403, IS421, ISKpn8, ISKpn8, ISEc38,                                                                      |
| 10EP | 89                         | gad, kpsE, kpsMII_K1, irp2, fyuA, papC, papA_F12, terC, traT, iss                                                                   | IS6100, ISEc43, ISEc38, ISEcB1, ISKox3, ISEc30, ISEc1, IS682, IS421, IS26, MITEEc1                                         |
| 11EP | 93                         | sitA, iucC, traT, lpfA, air, fyuA, irp2, eilA, eilA, gad, chuA, terC, kpsE, yfcV, terC                                              | IS6100, ISEc81, ISKpn8, ISEc38, ISEc30, IS421, ISEc45,                                                                     |
| 12EP | 93                         | lpfA, terC, iss, ompT, terC                                                                                                         | IS3, MITEEc1, ISSen4,                                                                                                      |
| 15EP | 93                         | sitA, cnf1, fyuA, clbB, gad, focCsfA, sfaD, chuA, iss, pic, vat, hra, terC, iss, iroN, kpsE, yfcV, cea, mchF, kpsMII_K23, usp, tcpC | ISEc42, MITEEc1, ISEc17, ICEEcIHE3034-1, ISEc38, ISEc13, ISEc41, IS100, ISEc38, ISEc31                                     |

|      |    |                                                                              |                                                                                                                  |
|------|----|------------------------------------------------------------------------------|------------------------------------------------------------------------------------------------------------------|
| 20EP | 93 | cia, kpsE, kpsMII_K5, gad, eilA, traT, irp2, hra, chuA, papA_F19, terC, fyuA | Tn2, IS4, ISEc30, IS100, IS26                                                                                    |
| 24EP | 93 | traT, kpsMII_K5, kpsE, eilA, terC, chuA, irp2, fyuA, cia, gad, hra, terC     | IS6100, IS4, ISEc30, IS100, ISKpn8, IS26,                                                                        |
| 25EP | 93 | terC, eilA, hra, kpsE, kpsE, irp2, fyuA, chuA, papA_F19, gad, cia, traT      | Tn2, IS4, IS100, ISEc30, IS26,                                                                                   |
| 26EP | 94 | astA, afaD, eilA, air, aap, ORF3, iutA, iucC, capU, terC, hra, traT, chuA    | MITEEc1, ISSpu2, IS629 cn_7104_IS629, IS911, IS682, ISEc30, MITEEc1, ISEc1, IS609, IS100, ISEc31, ISEc38, ISEc46 |
| 27EP | 93 | iha, iha, traT, terC, afaC, afaD, iss, fyuA, irp2, gad, terC, hra            | IS6100, MITEEc1, ISKpn8, IS609, ISEc45, IS30, IS421, ISEc10, IS3, IS102, ISKox3                                  |
| 28EP | 93 | traT, gad, gad, irp2, fyuA, terC                                             | IS6100, MITEEc1, ISKpn8, IS4, IS30, IS3, ISKpn26, IS26                                                           |
| 30EP | 93 | eilA, air, chuA, fyuA, irp2, terC, kpsE, gad, terC, traT                     | IS102, , ISEc38, ISEc17, Tn5403, MITEEc1, ISEc1, IS609, IS4, cn_3324_ISEc1, ISEc30, ISKpn8, IS5075               |
| 1KE  | 90 | iutA, terC, traT                                                             | ISEc9, IS6100, ISKpn24, ISEc30, ISKox1, ISEsa1, ISSm1, IS5075, ISKpn28, IS26, Tn3                                |
| 2KE  | 91 | iutA                                                                         | ISSty2, ISSen4, ISKpn43, ISSpu2,                                                                                 |
| 7KE  | 92 | iutA, terC, traT                                                             | S903, SEc15, SKpn21, SKpn1, Tn3                                                                                  |
| 8KE  | 92 | iutA                                                                         | SKox1, SEc52,                                                                                                    |
| 11ke | 90 | iutA, traT                                                                   | SSty2, SEc52, SKpn14, SKpn24, SKpn38, SKpn28, SKpn1,                                                             |
| 12ke | 89 | iutA, terC, traT                                                             | Tn6082, ISKpn43, Tn5403, ISEhe3, ISKpn38, ISEsa1, ISSty2                                                         |
| 15ke | 91 | iutA, terC                                                                   | ISEsa1, ISKpn14, ISKpn47, ISKpn43, IS102, ISKpn26, ISCfr26, ISKpn28                                              |
| 16ke | 80 | iutA                                                                         | ISKpn41, ISKpn28,                                                                                                |
| 17ke | 90 | iutA                                                                         | ISSty2, ISKpn43, IS5075,                                                                                         |
| 19ke | 90 | irp2, fyuA, iutA, traT                                                       | ICEEcoED1a-1, ISKpn26, IS26, ISEam1, ISKpn14, ISKpn1                                                             |
| 20ke | 90 | iutA, traT                                                                   | ISEhe3, ISKpn8, IS26, ISSen4, ISKpn34                                                                            |
| 21ke | 90 | iutA                                                                         | NIL                                                                                                              |
| 23ke | 89 | iutA                                                                         | ISEc33, ISEc52, ISSty2, ISKpn1,                                                                                  |
| 3KP  | 92 | iutA, traT                                                                   | SEhe3, SSm1, S5075, SKpn42, SKpn14, SKpn21, SKpn38, SKpn43                                                       |
| 5KP  | 92 | iutA, traT                                                                   | S5075, SEc9, SEhe3, SEcl1, SKpn1, SEc15, S6100, Tn3                                                              |
| 6KP  | 90 | iutA, traT                                                                   | S5075, SEc9, SEc15, SKpn1, SEhe3, SEcl1, S6100, Tn3                                                              |
| 7KP  | 89 | iutA, traT                                                                   | S5075, SEc9, SKpn1, SEhe3, SEcl1, SEc15                                                                          |



|      |    |            |                                                            |
|------|----|------------|------------------------------------------------------------|
| 12kp | 81 | iutA, traT | IS5075, ISEc9, ISKpn1, IS6100, ISEc15, ISEhe3, ISEcl1      |
| 13kp | 90 | iutA, traT | IS5075, ISEc9, IS6100, ISEhe3, ISKpn1, ISEcl1, ISEc15, Tn3 |
| 14kp | 90 | iutA, traT | IS5075, ISEc9, ISEcl1, ISEhe3, ISEc15, IS6100, Tn3         |

**Table S5.** Co-occurrence of antimicrobial-resistance genes and transposases.

| ID   | Sample Source                    | Contig number | Contig length (Coverage) | ARG                            |             | IS/Tn  |             | Plasmid    |           |
|------|----------------------------------|---------------|--------------------------|--------------------------------|-------------|--------|-------------|------------|-----------|
|      |                                  |               |                          | Name                           | position    | Name   | Position    | Name       | Position  |
| 1EP  | Wound of postoperative infection | 33            | 15007 (124)              | <i>qnrB4</i>                   | 1044-400    | IS6100 | 10897-11776 |            |           |
|      |                                  |               |                          | <i>mph(A)</i>                  | 14034-14939 |        |             |            |           |
|      |                                  |               |                          | <i>qacE</i>                    | 7614-7824   |        |             |            |           |
|      |                                  |               |                          | <i>sul1</i>                    | 7884-8723G  |        |             |            |           |
|      |                                  |               |                          | <i>blaDHA-1</i>                | 5168-6307   |        |             |            |           |
| 8EP  | UTI                              | 652           | 9813 (30)                | <i>dfrA17</i>                  | 1224-751    | IS6100 | 5703-6582   |            |           |
|      |                                  |               |                          | <i>qacE</i>                    | 2349-2630   |        |             |            |           |
|      |                                  |               |                          | <i>mph(A)</i>                  | 8840-9745   |        |             |            |           |
|      |                                  |               |                          | <i>sul1</i>                    | 2690-3529   |        |             |            |           |
|      |                                  |               |                          | <i>aadA5</i>                   | 1355-2143   |        |             |            |           |
|      |                                  | 381           | 5965 (31)                | <i>bla</i> <sub>CTX-M-15</sub> | 2453-3328   | ISEc9  | 749-2404    | IncFII(29) | 6928-7186 |
|      |                                  | 131           | 17556 (264)              |                                |             | Tn5403 | 47-3694     |            |           |
| 10EP | Wound of postoperative infection | 79            | 9975 (457)               | <i>mph(A)</i>                  | 9004-9906   | IS6100 | 5855-6734   |            |           |
|      |                                  |               |                          | <i>dfrA17</i>                  | 1376-903    |        |             |            |           |

|      |                                |      |              |                              |           |                   |             |        |               |
|------|--------------------------------|------|--------------|------------------------------|-----------|-------------------|-------------|--------|---------------|
|      |                                |      |              | <i>sul1</i>                  | 2842-3681 |                   |             |        |               |
|      |                                |      |              | <i>aadA5</i>                 | 1507-2295 |                   |             |        |               |
| 11EP | Wound of                       | 257  | 9949 (100)   | <i>qacE</i>                  | 7231-7512 | IS6100            | 3279-4158   |        |               |
|      | postoperative infection        |      |              | <i>dfrA17</i>                | 8637-9110 |                   |             |        |               |
|      |                                |      |              | <i>mph(A)</i>                | 1021-116  |                   |             |        |               |
|      |                                |      |              | <i>sul1</i>                  | 6332-7171 |                   |             |        |               |
|      |                                |      |              | <i>aadA5</i>                 | 7718-8506 |                   |             |        |               |
| 14EE | Water                          | 13   | 126908 (264) |                              |           | IS679             | 72830-75533 | IncFII | 121336-121595 |
|      |                                |      |              |                              |           | ISKpn24           | 79321-81774 |        |               |
|      |                                |      |              |                              |           | IS682             | 24433-26966 |        |               |
|      |                                |      |              |                              |           | IS30              | 10801-12021 |        |               |
|      |                                |      |              |                              |           | cn_51933<br>IS679 | 23600-75533 |        |               |
| 16EE | Water                          | 45   | 5269 (231)   | <i>qnrS1</i>                 | 3599-4255 | ISKpn19           | 1-2850      |        |               |
|      |                                | 48   | 3983 (254)   | <i>floR</i>                  | 1541-328  | ISVsa3            | 2660-3636   |        |               |
|      |                                | 42   | 13543 (230)  |                              |           | IS102             | 37-1092     | p0111  | 2936-3820     |
| 20EP | Urine (Chronic Kidney Disease) | 224  | 8722 (222)   | <i>rmtB</i>                  | 1461-706  | Tn2               | 1484-6433   |        |               |
|      |                                |      |              | <i>bla</i> <sub>TEM-1B</sub> | 1631-2491 |                   |             |        |               |
| 24EP | sepsis                         | 1370 | 4166 (41)    | <i>mph(A)</i>                | 3195-4097 | IS6100            | 46-925      |        |               |

|      |                                |     |             |                              |           |        |           |  |  |
|------|--------------------------------|-----|-------------|------------------------------|-----------|--------|-----------|--|--|
| 25EP | Urine (Chronic Kidney Disease) | 401 | 8726 (142)  | <i>rmtB</i>                  | 1461-706  | Tn2    | 1484-6433 |  |  |
|      |                                |     |             | <i>bla</i> <sub>TEM-1B</sub> | 1631-2491 |        |           |  |  |
| 27EP | UTI                            | 580 | 11125 (169) | <i>mph(A)</i>                | 1022-117  | IS6100 | 3280-4159 |  |  |
|      |                                |     |             | <i>qacE</i>                  | 7232-7513 |        |           |  |  |
|      |                                |     |             | <i>dfrA17</i>                | 8638-9111 |        |           |  |  |
|      |                                |     |             | <i>sul1</i>                  | 6333-7172 |        |           |  |  |
|      |                                |     |             | <i>aadA5</i>                 | 7719-8507 |        |           |  |  |
| 28EP | Recurrent UTI                  | 165 | 21847 (142) | <i>mph(A)</i>                | 1023-118  | IS6100 | 3281-4160 |  |  |
|      |                                |     |             | <i>bla</i> <sub>TEM-35</sub> | 5141-6001 |        |           |  |  |

|      |     |    |               |        |           |        |           |        |           |
|------|-----|----|---------------|--------|-----------|--------|-----------|--------|-----------|
| 30EP | UTI | 77 | 6551 (306.4)  | tet(B) | 1898-3103 | IS102  | 3114-4170 |        |           |
|      |     | 66 | 11302 (252.7) |        |           | Tn5403 | 506-4169  | IncFII | 7404-7664 |

|     |            |    |               |                                |             |                                     |                                  |                |           |
|-----|------------|----|---------------|--------------------------------|-------------|-------------------------------------|----------------------------------|----------------|-----------|
| 1KE | Vegetables | 33 | 12084 (250.6) | <i>bla</i> <sub>TEM-1D</sub>   | 6334-7194   | IS1380-like,<br>ISKra4-like,<br>Tn3 | 3562-5217<br>7400-8400<br>1-2350 | PRIA4b<br>ORF3 | 9050-9650 |
|     |            |    |               | <i>qnrS1</i>                   | 10976-11632 |                                     |                                  |                |           |
|     |            |    |               | <i>bla</i> <sub>CTX-M-15</sub> | 2638-3513   |                                     |                                  |                |           |
|     |            | 34 | 5958 (241.1)  | <i>mph(A)</i>                  | 4984-5889   | IS6100                              | 1847-2726                        |                |           |

|     |                 |     |                |                                |            |               |                        |  |  |
|-----|-----------------|-----|----------------|--------------------------------|------------|---------------|------------------------|--|--|
| 2KE | Surface         | 16  | 130723 (310.9) | <i>OqxB</i>                    | 10870-7718 | ISSty2        | 2245-3503              |  |  |
|     |                 |     |                | <i>OqxA</i>                    | 6519-7694  |               |                        |  |  |
| 5KP | Neonatal sepsis | 361 | 2832 (183)     | <i>sul2</i>                    | 1982-2797  | IS5075        | 223-1549               |  |  |
|     |                 |     |                | <i>aph(6)-Ia</i>               |            | IS91          |                        |  |  |
|     |                 |     |                | <i>aph(3'')-Ib</i>             |            |               |                        |  |  |
|     |                 | 334 | 5415 (178)     | <i>bla</i> <sub>CTX-M-15</sub> | 2506-3381  | ISEc9,<br>Tn3 | 802-2457<br>3786 -6005 |  |  |

|     |                 |     |            |                                |           |        |           |  |  |
|-----|-----------------|-----|------------|--------------------------------|-----------|--------|-----------|--|--|
| 6KP | Neonatal sepsis | 522 | 5098 (163) | <i>aph(6)-Id</i>               | 3661-4497 | IS5075 | 223-1549  |  |  |
|     |                 |     |            | <i>aph(3'')-Ib</i>             | 2858-3661 | IS91   |           |  |  |
|     |                 |     |            | <i>sul2</i>                    | 1982-2797 |        |           |  |  |
|     |                 | 281 | 6016 (171) | <i>bla</i> <sub>CTX-M-15</sub> | 2684-3559 | ISEc9  | 3608-5263 |  |  |
|     |                 |     |            |                                |           | Tn3    | 2279 - 60 |  |  |
| 7KP | Sepsis          | 140 | 5098 (197) | <i>aph(6)-Id</i>               | 1486-650  | IS5075 | 3598-4924 |  |  |
|     |                 |     |            | <i>aph(3'')-Ib</i>             | 1486-2289 | IS91   |           |  |  |
|     |                 |     |            | <i>sul2</i>                    | 2350-3165 |        |           |  |  |
|     |                 | 68  | 1641 (301) | <i>bla</i> <sub>CTX-M-15</sub> | 2684-3559 | ISEc9  | 3608-5263 |  |  |
|     |                 |     |            |                                |           | Tn3    | 1-2275    |  |  |

11KE Vegetables 1 501618 (228) *bla*<sub>SHV-1</sub> 27779-28645 **ISSty2** 459960-461218

|      |                 |     |             |                    |           |        |                           |  |  |
|------|-----------------|-----|-------------|--------------------|-----------|--------|---------------------------|--|--|
| 12KE | Fruits          | 303 | 13004 (100) | <i>aph(3'')-Ib</i> | 8477-9279 | Tn3,   | 1100-3900,<br>10100-12900 |  |  |
|      |                 |     |             | <i>aph(6)-Id</i>   | 7641-8477 | IS110  |                           |  |  |
| 13KP | Neonatal sepsis | 210 | 5098 (193)  | <i>aph(6)-Id</i>   | 1486-650  | IS5075 | 3598-4924                 |  |  |
|      |                 |     |             | <i>aph(3'')-Ib</i> | 1486-2289 | IS91   |                           |  |  |
|      |                 |     |             | <i>sul2</i>        | 2350-3165 |        |                           |  |  |

156 6016 (249) *bla*<sub>CTX-M-15</sub> 2684-3559 **ISEc9** 3608-5263,  
**Tn3** 5077 -3815

|      |                 |     |            |                    |           |         |          |  |  |
|------|-----------------|-----|------------|--------------------|-----------|---------|----------|--|--|
| 14KP | Neonatal sepsis | 211 | 5098 (267) | <i>aph(6)-Id</i>   | 3661-4497 | IS5075, | 223-1549 |  |  |
|      |                 |     |            | <i>aph(3'')-Ib</i> | 2858-3661 | IS91    |          |  |  |

|      |                   |     |              |                                |           |                 |                 |                 |                 |
|------|-------------------|-----|--------------|--------------------------------|-----------|-----------------|-----------------|-----------------|-----------------|
|      |                   |     |              | <i>sul2</i>                    | 1982-2797 |                 |                 |                 |                 |
|      |                   | 256 | 3312 (277)   | <i>bla</i> <sub>CTX-M-15</sub> | 1-855     | <b>ISEc9Tn3</b> | 904-2559        |                 |                 |
| 15KE | Surface in Market | 35  | 10536 (306)  |                                |           | <b>ISKpn14</b>  | 3140-3907       | IncHI1B         | 8736-9305       |
| 16KE | Surface in Market | 11  | 133532 (143) |                                |           | <b>ISKpn41</b>  | 4042-5467       | IncFIB(Ma<br>r) | 36801-<br>37239 |
| 20KE | vegetables        | 34  | 38475 (784)  |                                |           | <b>ISEhe3</b>   | 35866-<br>37094 | repA            | 31937-<br>32627 |

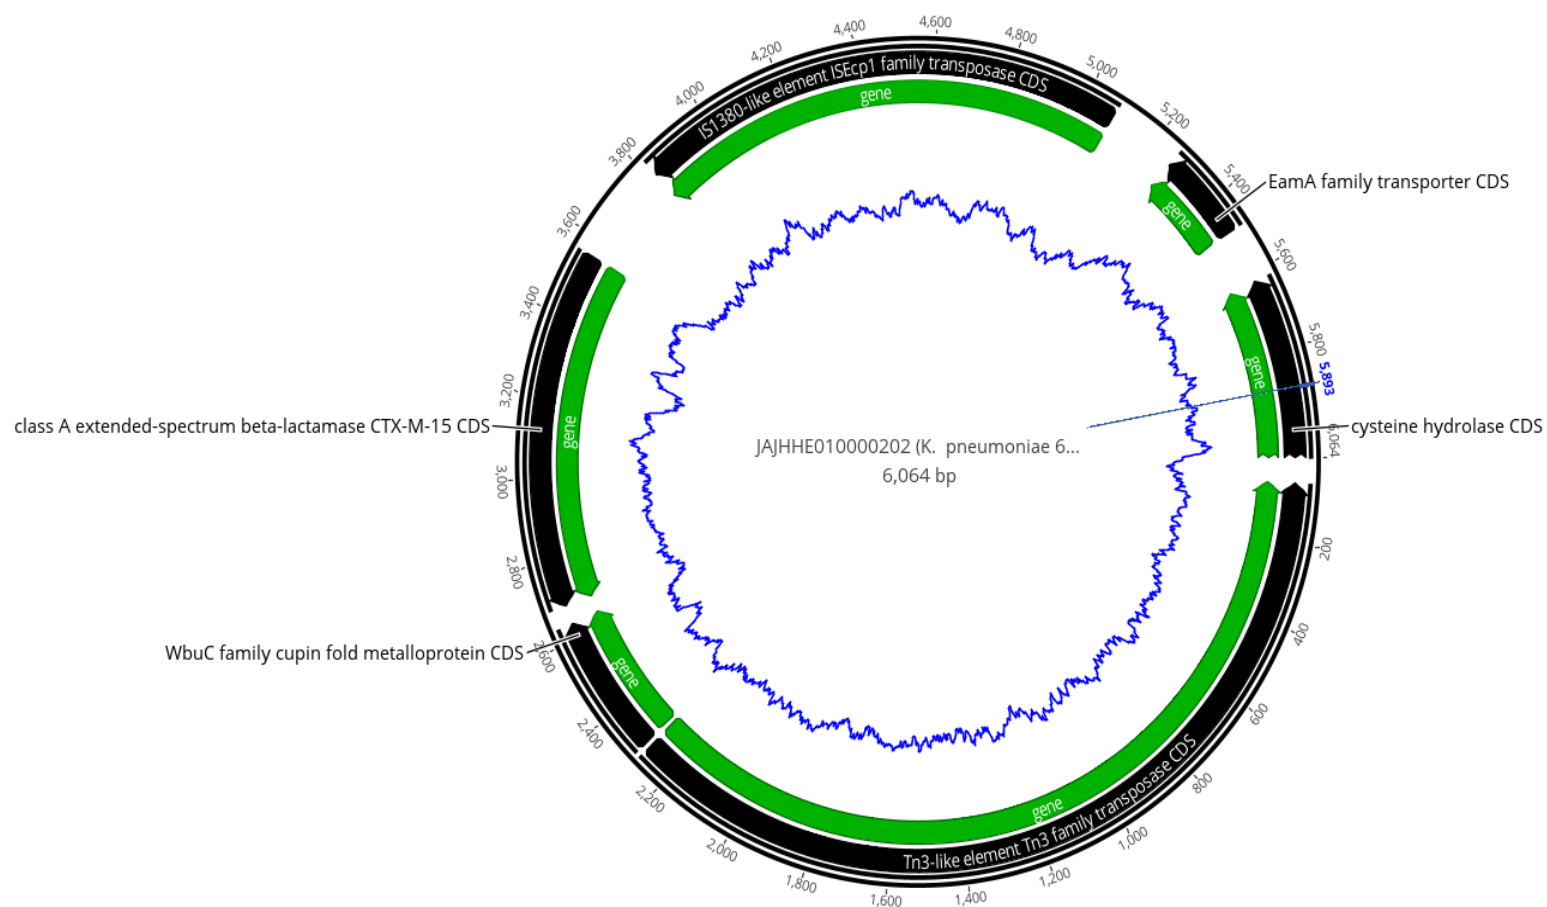

Figure S1. Map of different antibiotic-resistant genes, transposases, and plasmid, clustered in contig 202 of clinical *K. pneumoniae* (5KP) isolate. Showing an example for the presence of *CTX-M-15* gene between two transposases. The outer black circle indicates for the length of the contig, black arrows indicate for coding sequences (CDS), green arrows indicate genes, and blue inner zigzag circle indicates GC content.

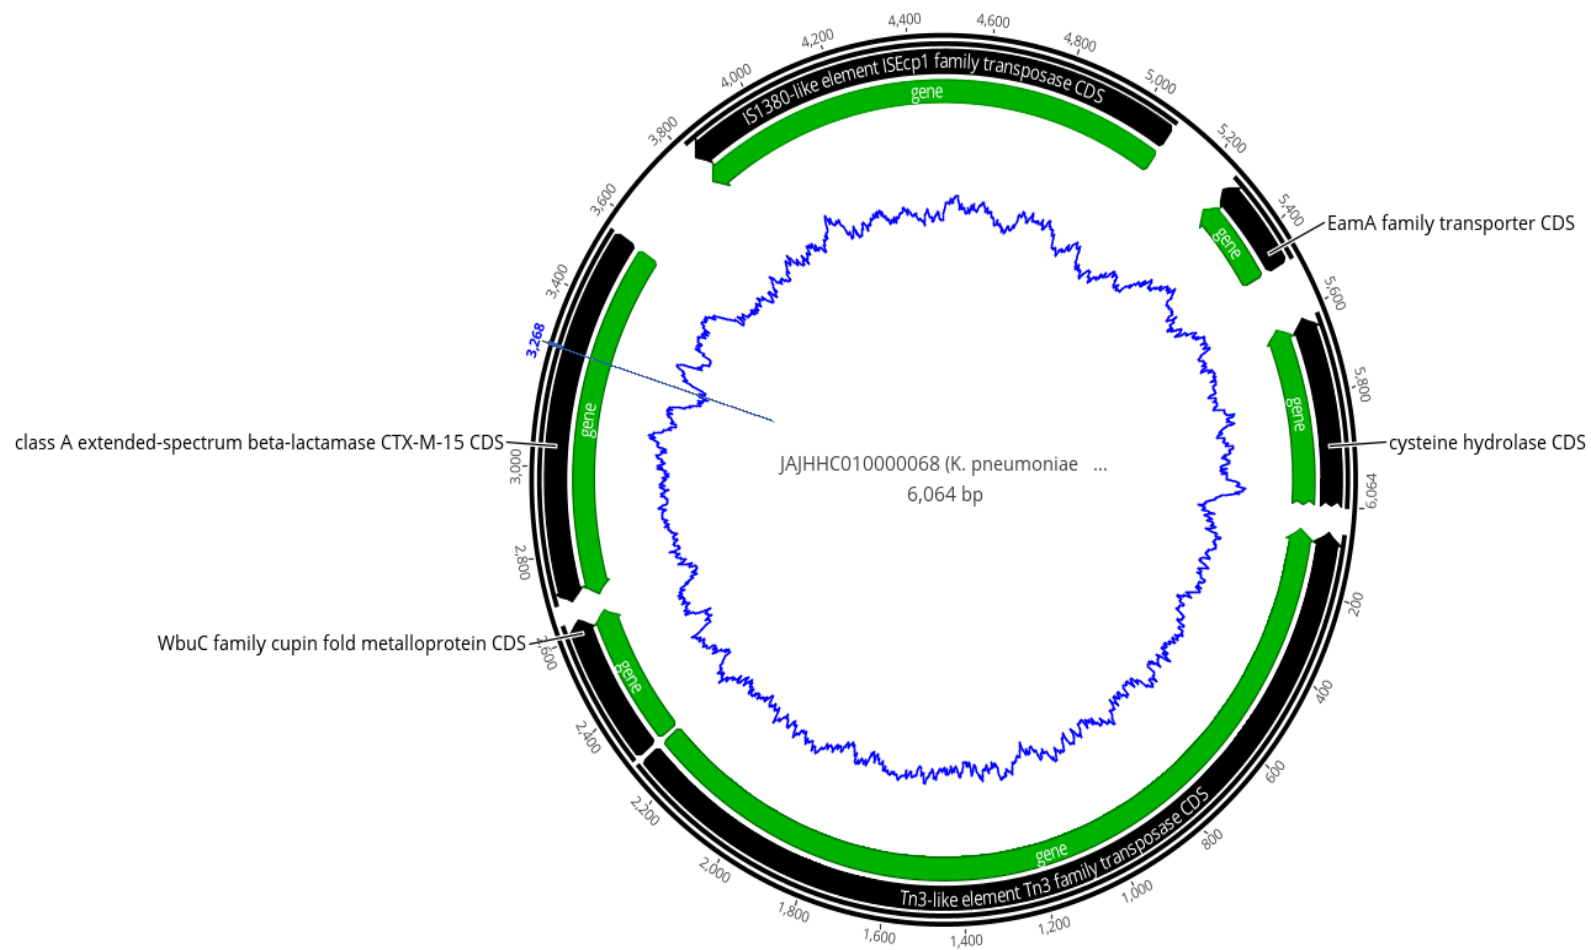

*Figure S2.* Map of different antibiotic resistant genes, transposases, and plasmid, clustered in contig 68 of clinical *K. pneumoniae* (7KP) isolate. Showing an example for the presence of *CTX-M-15* gene between two transposases. The outer black circle indicates for the length of the contig, black arrows indicate for coding sequences (CDS), green arrows indicate genes, and blue inner zigzag circle indicates GC content

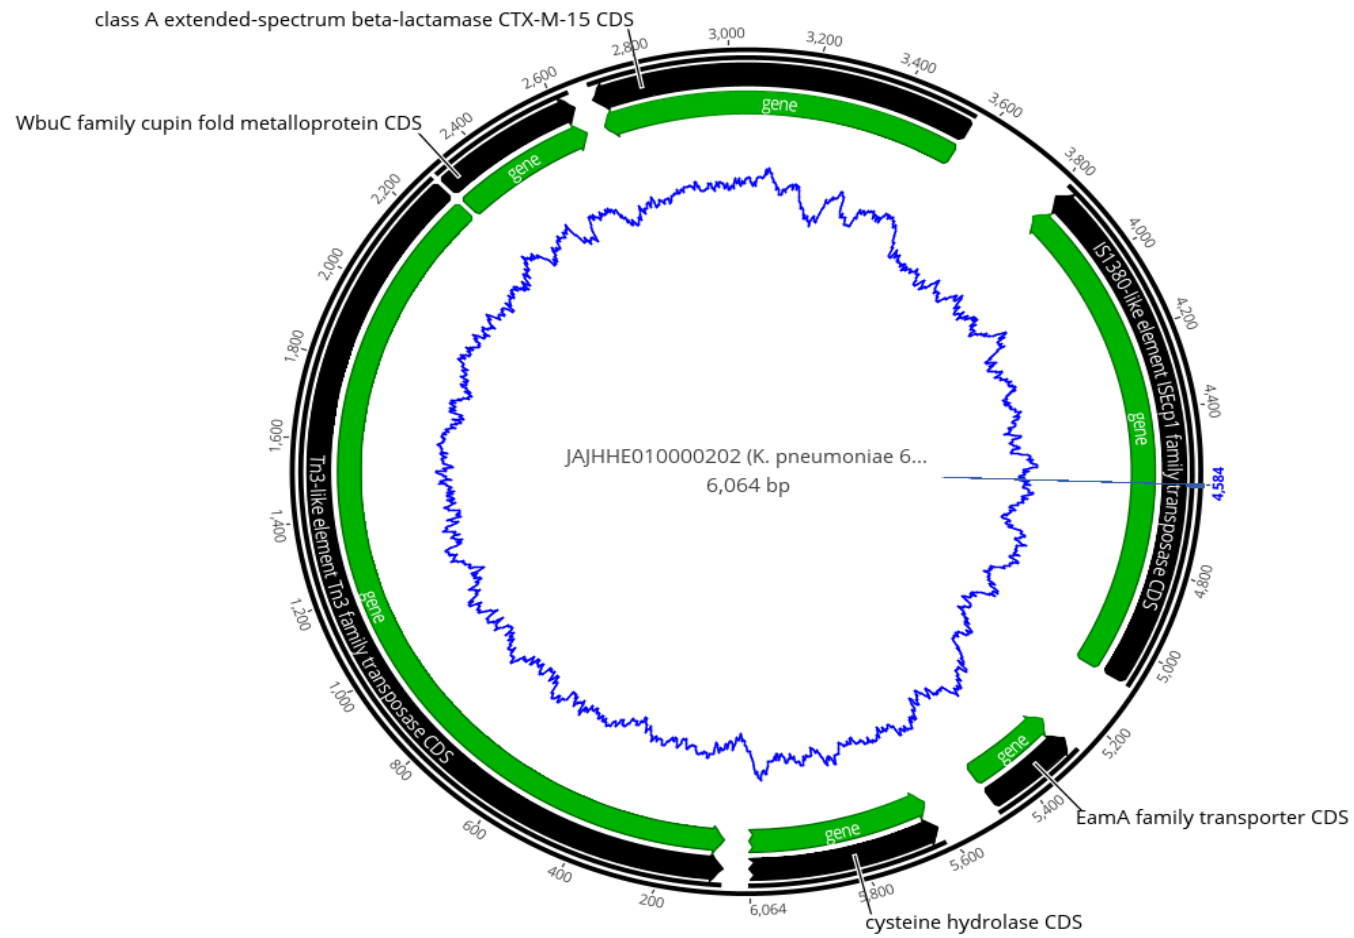



*Figure S3.* Map of different antibiotic resistant genes, transposases, and plasmid, clustered in contig 202 of clinical *K. pneumonia* (6KP) isolate. Showing an example for the presence of *CTX-M-15* gene between two transposases. The outer black circle indicates for the length of the contig, black arrows indicate for coding sequences (CDS), green arrows indicate genes, and blue inner zigzag circle indicates GC content

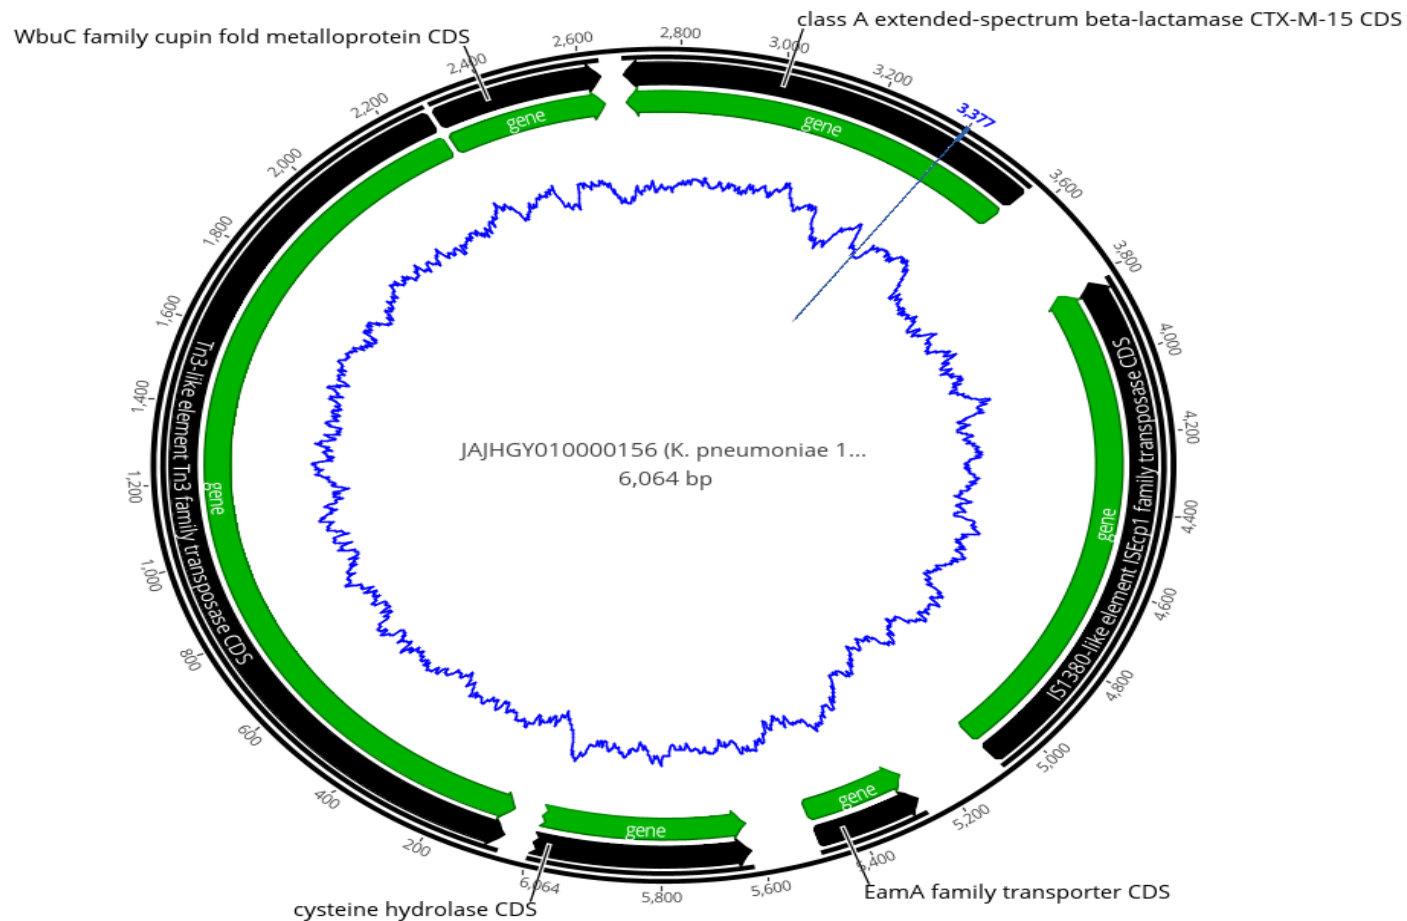

Figure S4. Map of different antibiotic resistant genes, transposases, and plasmid, clustered in contig 156 of clinical *K. pneumoniae* (13KP) isolate. Showing an example for the presence of CTX-M-15 gene between two transposases. The outer black circle indicates for the length of the contig, black arrows indicate for coding sequences (CDS), green arrows indicate genes, and blue inner zigzag circle indicates GC content.

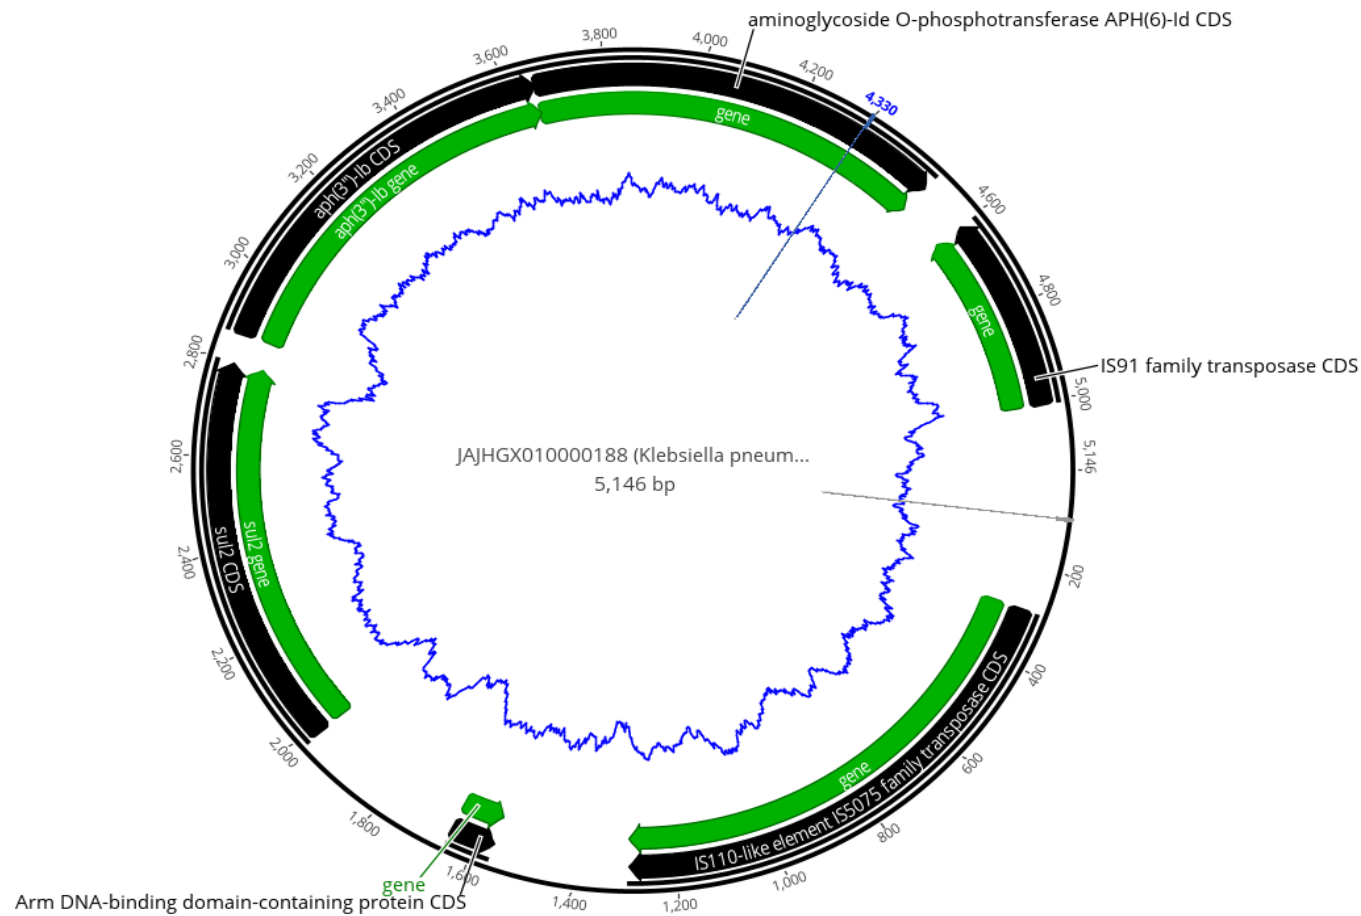

Figure S5. Map of different antibiotic resistant genes, transposases, and plasmid, clustered in contig 156 of clinical *K. pneumoniae* (14KP) isolate. Showing an example for the presence of aminoglycosides genes flanked by transposases. The outer black circle indicates for the length of the contig, black arrows indicate for coding sequences (CDS), green arrows indicate genes, and blue inner zigzag circle indicates GC content
